# Supplementary material for: A novel small-form NEDD4 regulates cell invasiveness and apoptosis to promote tumor metastasis
Source: PubMed Central journal article supplement (PMC4496221; doi:10.18632/oncotarget.3322), 2015-03-20
Supplement: oncotarget-06-9341-s001.pdf [file oncotarget-06-9341-s001.pdf]

## SUPPLEMENTARY FIGURES AND TABLES

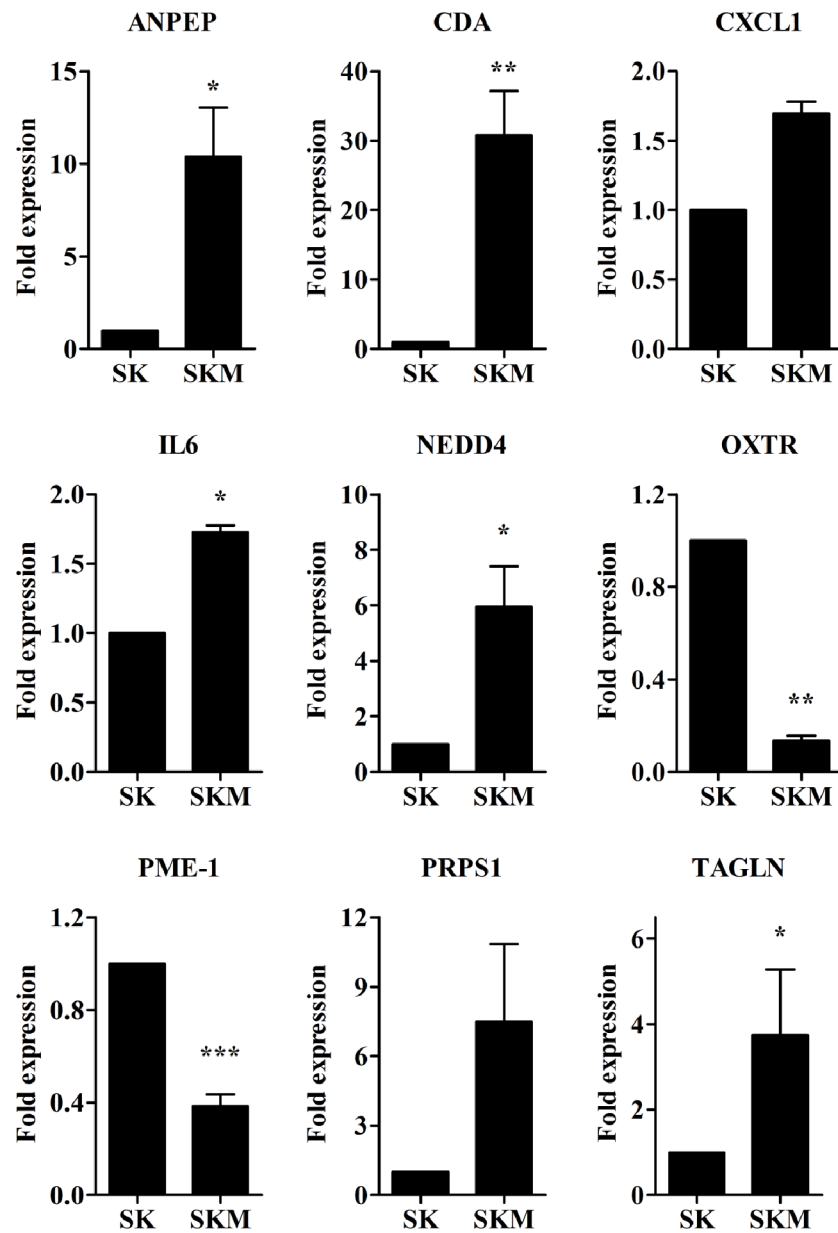

**Supplementary Figure S1: Verify the results of DNA microarray analyses** The mRNA level of metastasis-related genes was verified using qRT-PCR.

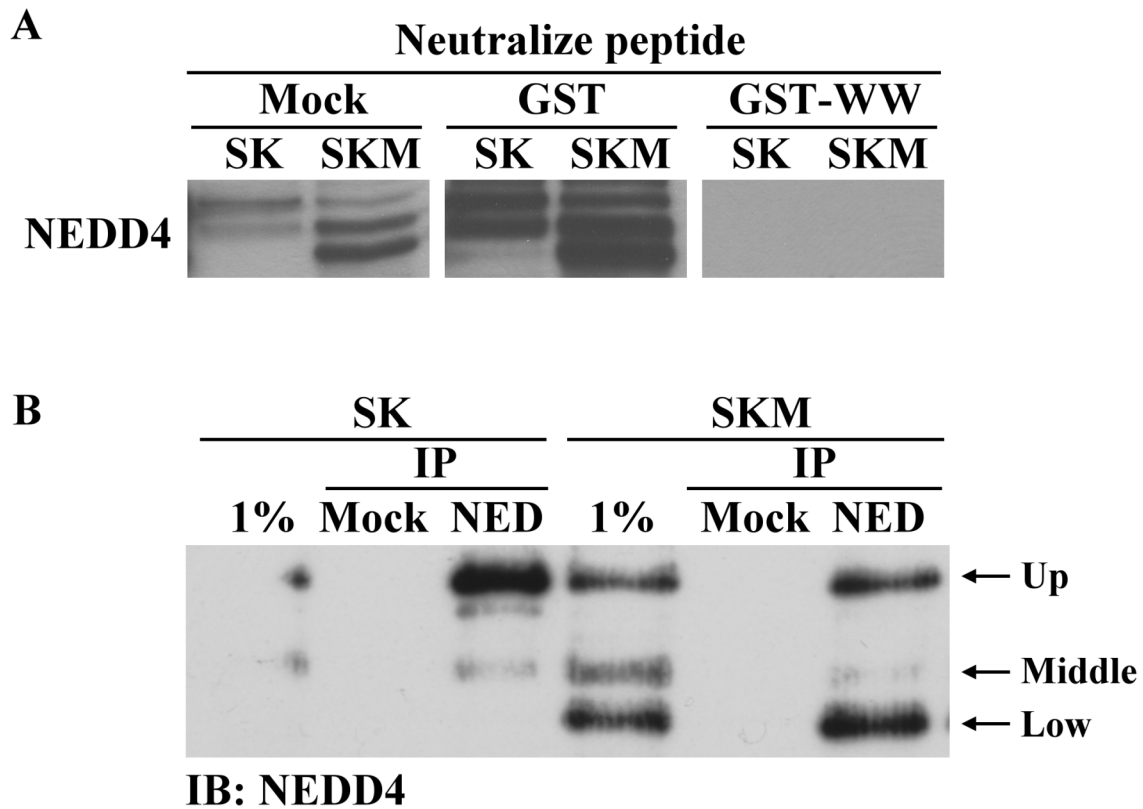

**Supplementary Figure S2: NEDD4 antibody specificity** (A) Antibody specificity was tested using Western blot with control (GST) or NEDD4-neutralizing peptide (GST-WW). (B) Cell lysates of SK or SKM cells were immunoprecipitated with the NEDD4 antibody (NED) and separated via SDS-PAGE, and the signals visualized via Western blot. GST, glutathione-S transferase; GST-WW, GST fusion NEDD4-WW domain; IP, immunoprecipitation; 1%, 1% in-put.

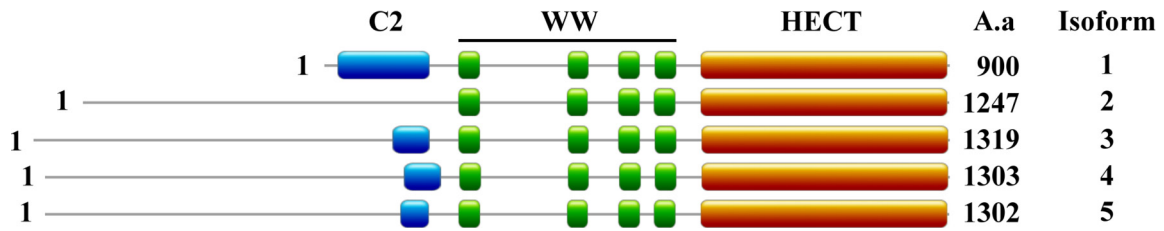

**Supplementary Figure S3: Schematic diagram of NEDD4 protein structure** The schematic cartoon represents protein structures of five NEDD4 isoforms.

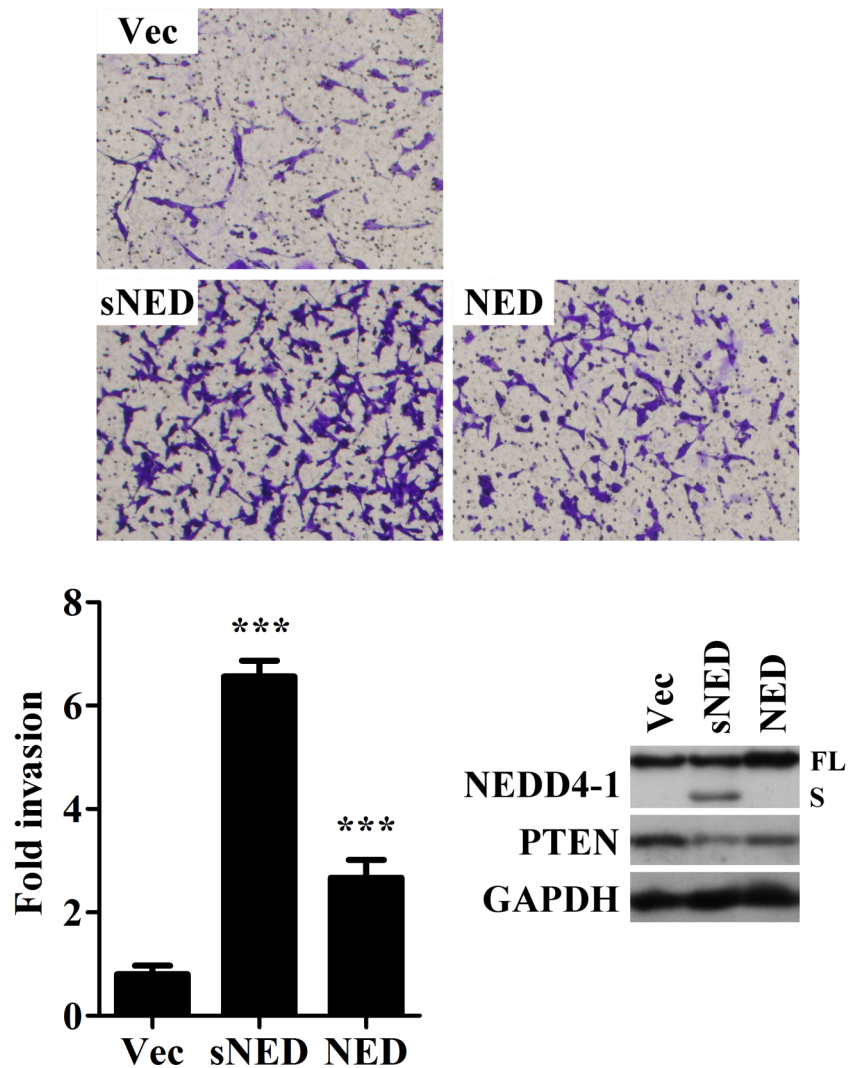

**Supplementary Figure S4: sNEDD4 promotes tumor cell invasion *in vitro*** The invasive ability of control (Vec), sNEDD4-overexpressing (sNED) and NEDD4-overexpressing (NED) stable cell lines was determined with the Transwell invasion assay. NEDD4 and sNEDD4 protein levels of each cell were determined using Western blot. \*\*\* $P < 0.001$ .

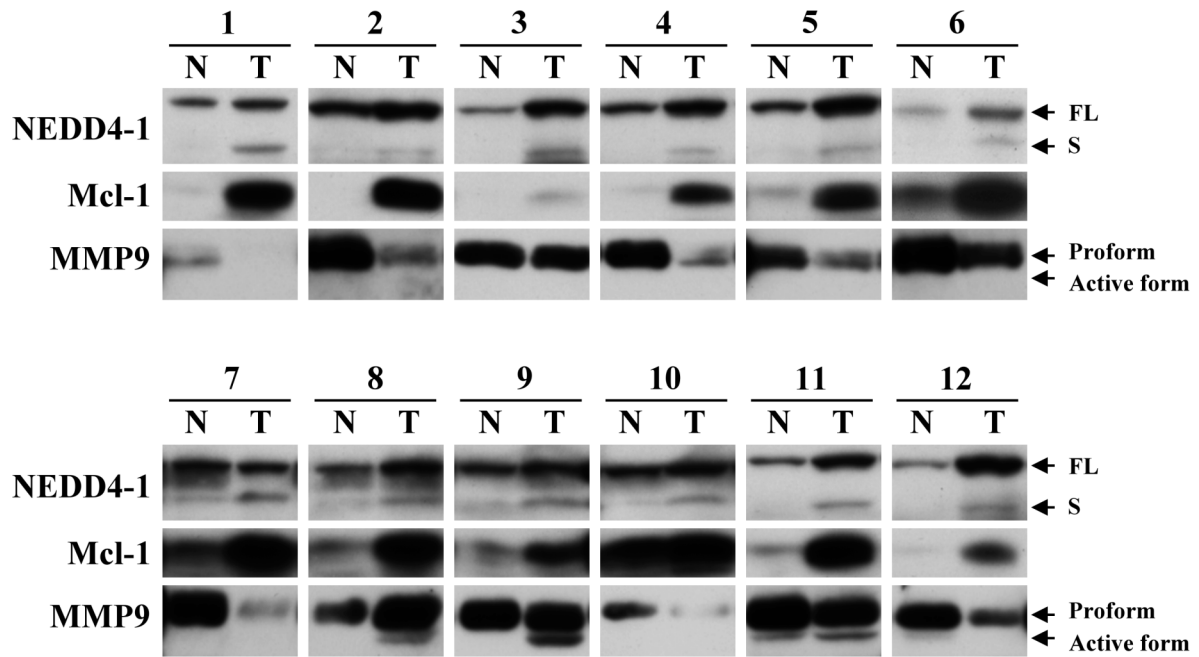

**Supplementary Figure S5: Expression of MMP9 and Mcl-1 in HCC** Protein levels of MMP9 and Mcl-1 of 70 paired HCC specimens were determined using Western blot. Represented results were shown. N, adjacent normal tissue; T, tumor tissue; FL, full-length NEDD4; S, sNEDD4.

**Supplementary Table S1: Peptide representing NEDD4 and NEDD4-L identified by LC-MS/MS**

| Immunoreactive band | Gene name           | Corresponding peptides                                                                                                                                                                                                             |
|---------------------|---------------------|------------------------------------------------------------------------------------------------------------------------------------------------------------------------------------------------------------------------------------|
| Upper               | NEDD4               | VRVIAGIGLAK<br>DILGASDPYBRBTLYD<br>PMNGVLTSVQ<br>LLFEVFDENR<br>DFVLHPR<br>TYYYVNHESR<br>LTIFGNSAVSQPASSNHSSR<br>IFYINHNIK<br>LENVAITGPAVPYSR<br>RATVLEDSYRR<br>GLDYGGVAR<br>VAGMAVYHGK<br>NGGSEIVVTNK<br>AVLMMDSEK<br>LLQFVTHTSR   |
| Middle              | NEDD4<br><br>NEDD4L | GLDYGGVAR<br>LLQFVTGTSR<br>QINQEAAHR<br>TSPQELSEELSR<br>SLSSPTVTLAPLEGAK<br>DTLSNPQSPQPSYPYNSPKPQHK<br>FPVHMR<br>TFYIDHNSK<br>LQNPAITGPAVPYSR<br>KPADIPNRFEMK<br>NNIFEESYRR<br>GLDYGGVAR<br>VAGLAVFHGK<br>AVLLMDAEKR<br>LLQFVTGTSR |
| Lower               | NEDD4               | IFYINHNIK<br>LENVAITGPAVPYSR<br>FIIDEELFGQT<br>LLQFVTGTSR                                                                                                                                                                          |

**Supplementary Table S2: Patient and tumor characteristics**

| Parameter                 | <i>n</i> (%) |
|---------------------------|--------------|
| Median age (range; years) | 60 (23–85)   |
| Gender                    |              |
| Male                      | 39 (63.9%)   |
| Female                    | 22 (36.1%)   |
| Stage                     |              |
| I                         | 27 (44.3%)   |
| II                        | 20 (32.8%)   |
| III                       | 14 (22.9%)   |
| Histological type         |              |
| Solitary                  | 44 (72.1%)   |
| Multiple                  | 17 (27.9%)   |
| Grading                   |              |
| 1                         | 3 (4.9%)     |
| 2                         | 43 (70.5%)   |
| 3                         | 15 (24.6%)   |
| Tumor size                |              |
| ≤ 4cm                     | 31 (50.8%)   |
| > 4cm                     | 30 (49.2%)   |
| Vascular invasion         |              |
| Absence                   | 30 (49.2%)   |
| Capsular vein             | 2 (3.3%)     |
| Portal vein               | 29 (47.5%)   |
| Cirrhosis                 |              |
| No                        | 38 (62.3%)   |
| Yes                       | 23 (37.7%)   |
| Viral status              |              |
| HBV or HCV                | 56 (91.8%)   |
| NBNC#                     | 5 (8.2%)     |

#patients negative for both HBV and HCV
